# Supplementary material for: Prevalence and Molecular Characterization of Human Bocavirus Detected in Croatian Children with Respiratory Infection
Source: MDPI journal article supplement (doi:10.3390/v13091728), 2021-08-31
Supplement: s1 [file s1]

## Supplementary file 1

### Primer sequences and PCR conditions

| Primer | Sequence (5' – 3')     | Position*   | Annealing (°C) |
|--------|------------------------|-------------|----------------|
| B_fw   | GCCGGCAGACATATTGGATT   | 1 – 20      | 63             |
| B1_Rev | GCCACCAACAACCGCGTAGAT  | 1789 – 1809 |                |
| B2_Fw  | TTACGGGCCTGCTCAACAG    | 1515 – 1534 | 61             |
| B2_rev | CTGGATCCAATAATTCCACCAA | 3282 – 3303 |                |
| B3_fw  | CATGGAAGCAGATGCCTCC    | 3045 – 3063 | 63             |
| B_rev  | CGGCTAGGTTTCGAGACGG    | 5195 – 5212 |                |

\*in relation to GenBank sequence KP710213.

For full genome amplification, primers B\_fw and B\_rev were used, with 10 µL of isolated DNA. PCR reaction mixtures contained 1× Phusion HF Buffer (NEB), 200 µM dNTP mix, 0.5 µM of each primer, and 1 U of Phusion polymerase (NEB). PCR conditions were: 98 °C for 5 min, 35 cycles of 98 °C/10 s, 63 °C/30 s, 72 °C/5 min, followed by final extension at 72 °C for 10 min.

For amplification of overlapping pairs annealing temperature was adjusted according to table above and 5 µL of isolated DNA was used in reaction. PCR conditions were: 98 °C for 5 min, 35 cycles of 98 °C/10 s, Tann °C/30 s, 72 °C/1 min 30s, followed by final extension at 72 °C for 10 min.
